# Supplementary material for: PDE2A Is Indispensable for Mouse Liver Development and Hematopoiesis
Source: MDPI journal article supplement (doi:10.3390/ijms21082902), 2020-04-21
Supplement: s1 [file s1]

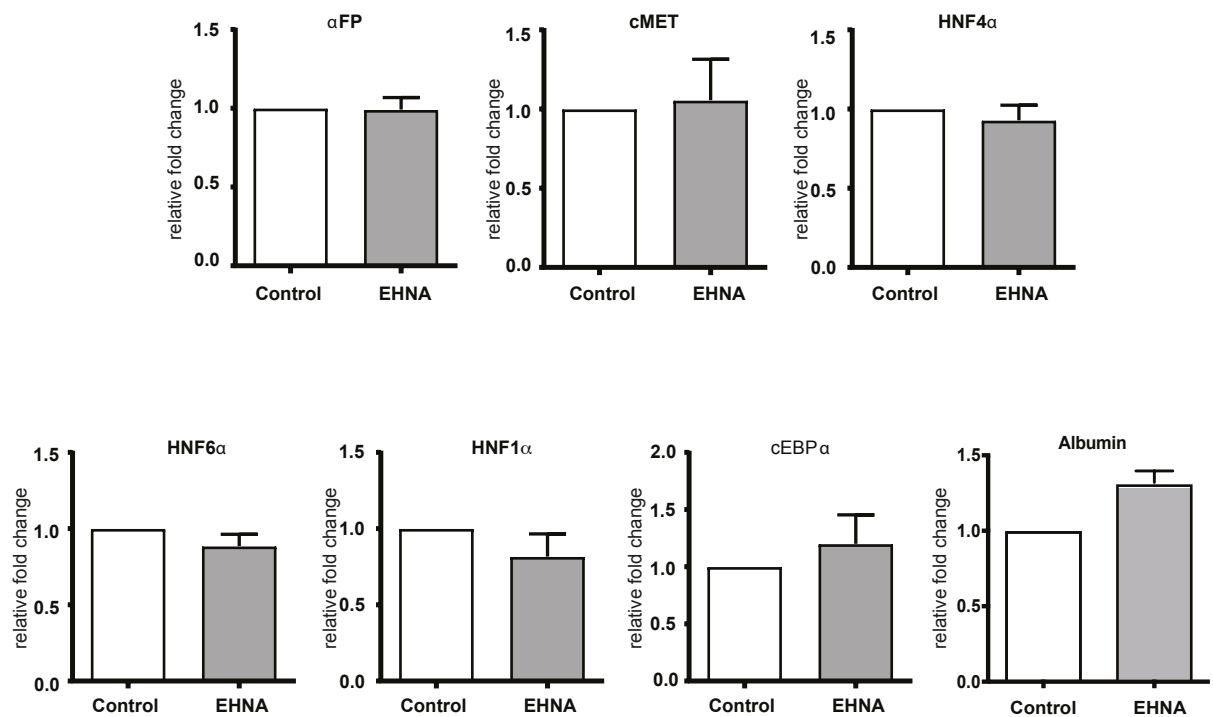

Supplementary Figure 2

**Supplementary Figure 2:** Quantitative RT-PCR of liver differentiation markers in hepatic cells isolated from E14.5 wild-type embryos after 48h of in vitro treatment with the PDE2A inhibitor EHNA 10 $\mu$ M. N=3.
