# Supplementary material for: PDE2A Is Indispensable for Mouse Liver Development and Hematopoiesis
Source: MDPI journal article supplement (doi:10.3390/ijms21082902), 2020-04-21
Supplement: s1 [file s1]

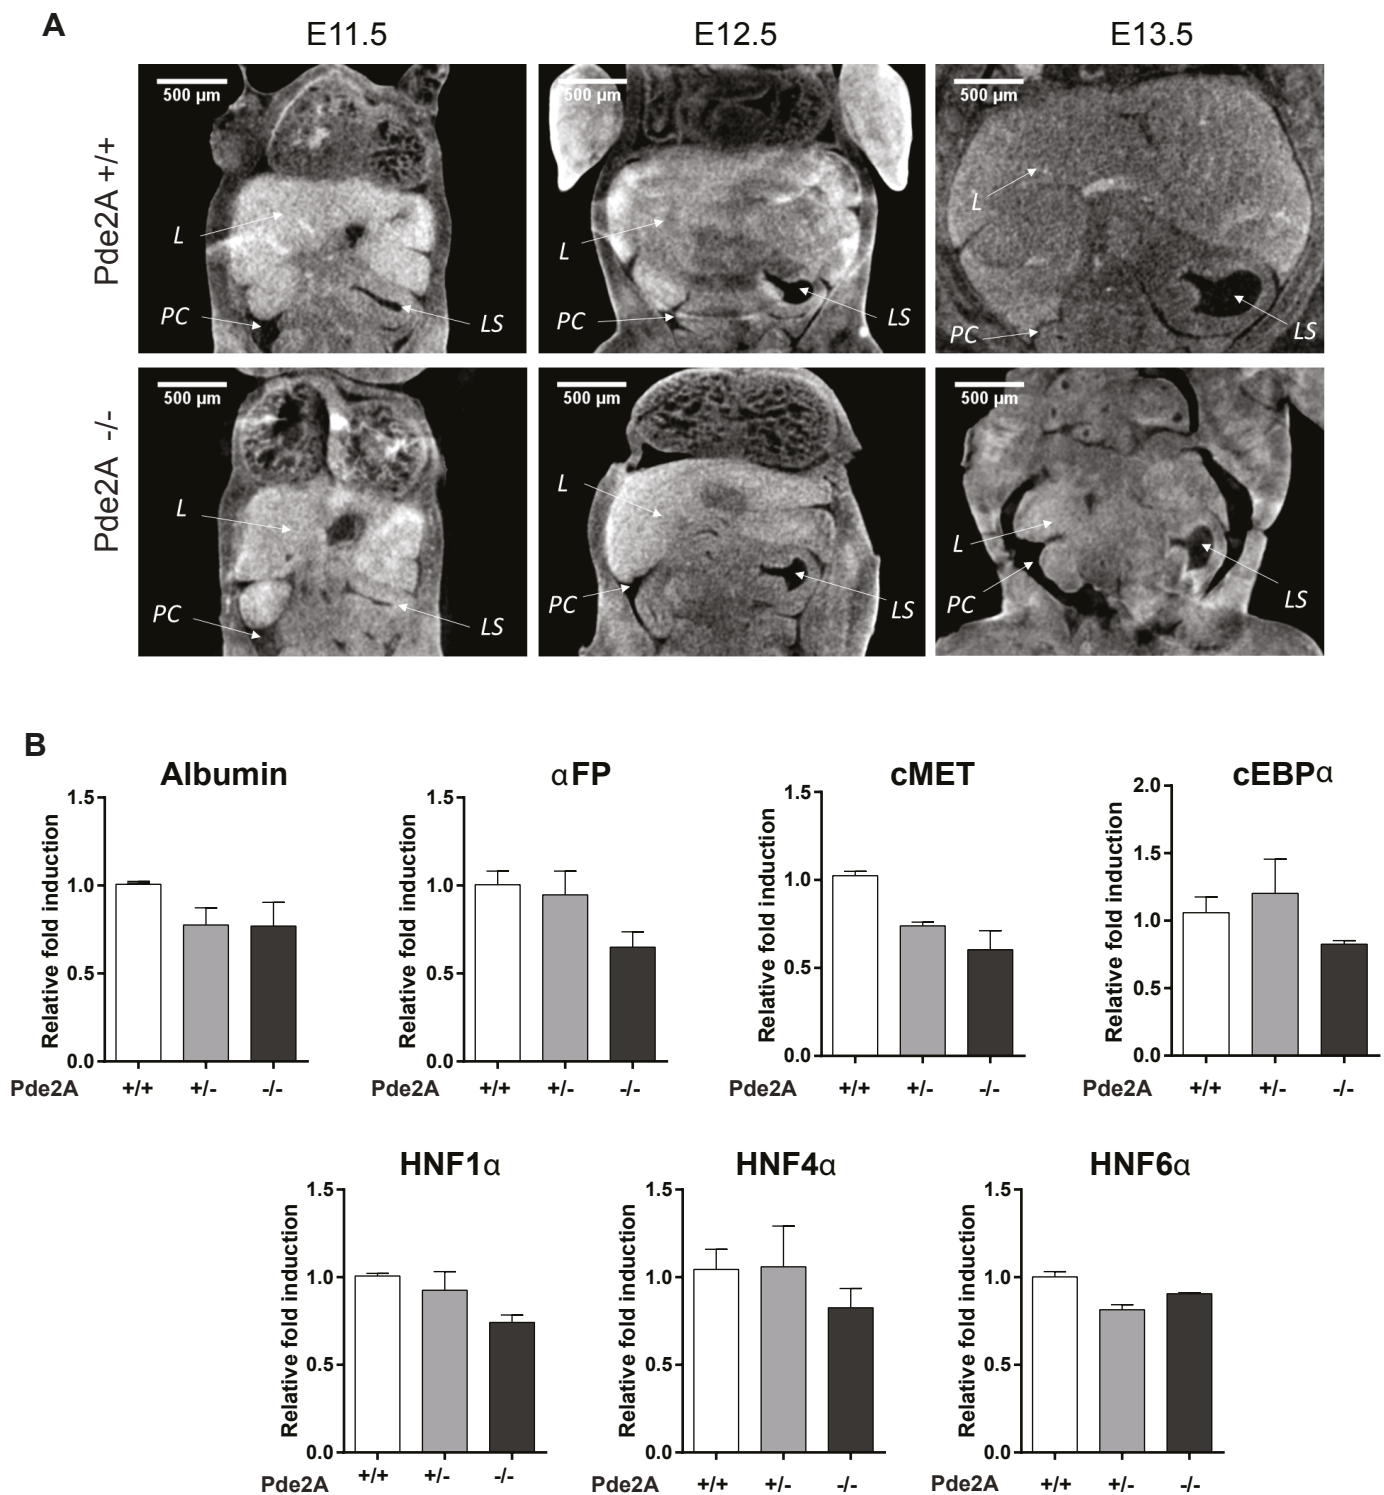

Supplementary Figure 1

**Supplementary Figure 1: (A)** Volume rendering visualization of coronal sections obtained from E11.5, E12.5 and E13.5 *PDE2A*<sup>+/+</sup> and *PDE2A*<sup>-/-</sup> embryos. Sections were chosen referring to the stomach lumen (LS) volume. L liver and PC peritoneal cavity. Scale bar: 500 $\mu$ m. **(B)** Quantitative RT-PCR in E 12.5 liver embryos shows reduction of expression of liver differentiation markers (albumin;  $\alpha$ -fetoprotein) and transcription factors (cMet, cEBP $\alpha$ , HNF1,4) in *Pde2A*<sup>-/-</sup> embryos. At least N=3 embryos/genotype were analyzed.
