# Supplementary material for: PDE2A Is Indispensable for Mouse Liver Development and Hematopoiesis
Source: MDPI journal article supplement (doi:10.3390/ijms21082902), 2020-04-21
Supplement: s1 [file s1]

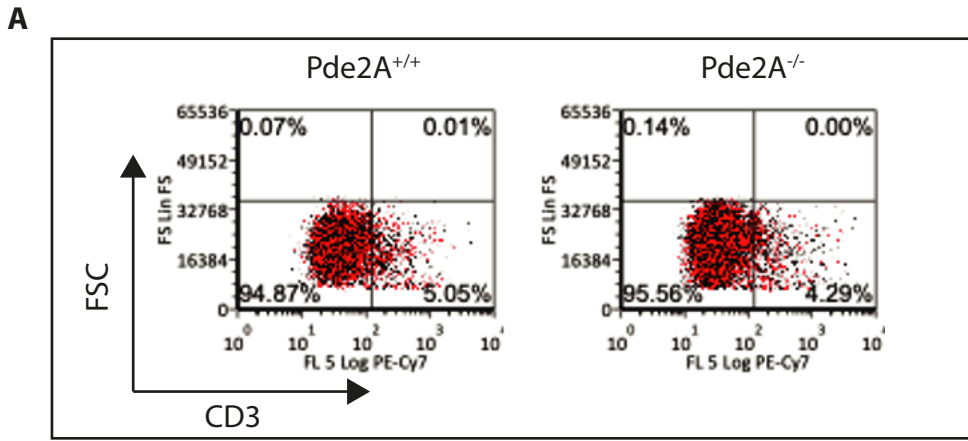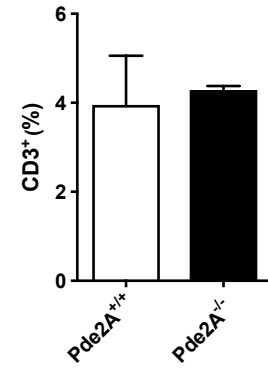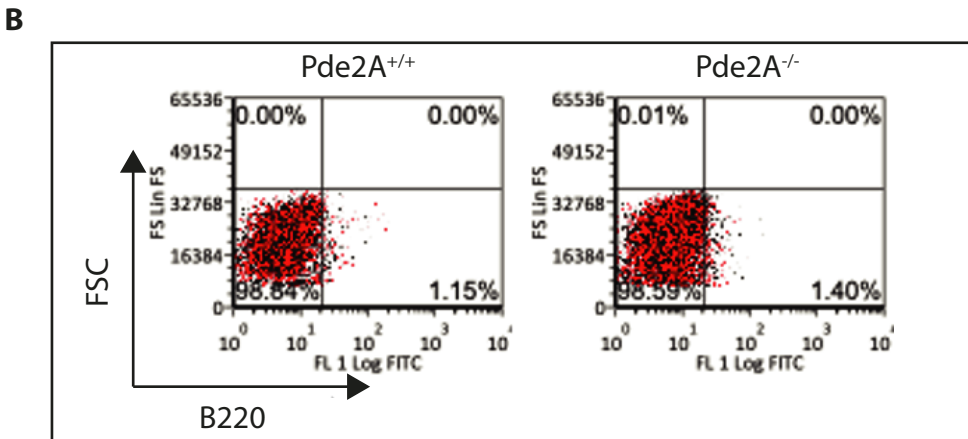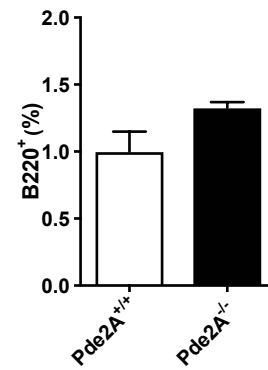

Supplementary Figure 3

**Supplementary Figure 3: The percentage of lymphocytes is normal in fetal liver of PDE2A<sup>-/-</sup> embryos.** Panels and histograms show flow cytometry analysis of T cells (**A**) and B cells (**B**) isolated from livers of E14.5 embryos and detected with antibodies anti-CD3 and anti-B220, respectively. PDE2A<sup>-/-</sup> embryos (right panels) compared to PDE2A<sup>+/+</sup> embryos (left panels) show similar percentage of T and B cells.
